# Supplementary material for: Genome Analysis of a New Rhodothermaceae Strain Isolated from a Hot Spring
Source: Front Microbiol. 2016 Jul 14;7:1109. doi: 10.3389/fmicb.2016.01109 (PMC4943939; doi:10.3389/fmicb.2016.01109)
Supplement: Supplementary file 1 [file DataSheet1.XLSX]

## Sheet: Absent in R. marinus DSM 4252  
Category	Subcategory	Subsystem	Role
Amino Acids and Derivatives	Alanine, serine, and glycine	Glycine and Serine Utilization	L-serine dehydratase, (PLP)-dependent (EC 4.3.1.17)
Amino Acids and Derivatives	Arginine; urea cycle, polyamines	Arginine Biosynthesis -- gjo	Acetylornithine aminotransferase (EC 2.6.1.11)
Amino Acids and Derivatives	Arginine; urea cycle, polyamines	Arginine Biosynthesis -- gjo	Ornithine carbamoyltransferase (EC 2.1.3.3)
Amino Acids and Derivatives	Aromatic amino acids and derivatives	Aromatic amino acid degradation	4-hydroxyphenylpyruvate dioxygenase (EC 1.13.11.27)
Amino Acids and Derivatives	Aromatic amino acids and derivatives	Aromatic amino acid degradation	5-carboxymethyl-2-hydroxymuconate delta-isomerase (EC 5.3.3.10)
Amino Acids and Derivatives	Aromatic amino acids and derivatives	Aromatic amino acid degradation	Phenylalanine-4-hydroxylase (EC 1.14.16.1)
Amino Acids and Derivatives	Aromatic amino acids and derivatives	Chorismate Synthesis	2-keto-3-deoxy-D-arabino-heptulosonate-7-phosphate synthase II (EC 2.5.1.54)
Amino Acids and Derivatives	Branched-chain amino acids	Leucine Degradation and HMG-CoA Metabolism	Methylcrotonyl-CoA carboxylase biotin-containing subunit (EC 6.4.1.4)
Amino Acids and Derivatives	Branched-chain amino acids	Leucine Degradation and HMG-CoA Metabolism	Methylcrotonyl-CoA carboxylase carboxyl transferase subunit (EC 6.4.1.4)
Amino Acids and Derivatives	Glutamine, glutamate, aspartate, asparagine; ammonia assimilation	Glutamate and Aspartate uptake in Bacteria	Asparagine synthetase [glutamine-hydrolyzing] (EC 6.3.5.4)
Amino Acids and Derivatives	Glutamine, glutamate, aspartate, asparagine; ammonia assimilation	Glutamine, Glutamate, Aspartate and Asparagine Biosynthesis	glutamine synthetase family protein
Amino Acids and Derivatives	Lysine, threonine, methionine, and cysteine	Cysteine Biosynthesis	Cystathionine beta-synthase (EC 4.2.1.22)
Amino Acids and Derivatives	Lysine, threonine, methionine, and cysteine	Cysteine Biosynthesis	Sulfate permease
Amino Acids and Derivatives	Lysine, threonine, methionine, and cysteine	Cysteine Biosynthesis	Sulfate permease, Trk-type
Amino Acids and Derivatives	Lysine, threonine, methionine, and cysteine	Cysteine Biosynthesis	Sulfite reductase [NADPH] hemoprotein beta-component (EC 1.8.1.2)
Amino Acids and Derivatives	Proline and 4-hydroxyproline	Proline, 4-hydroxyproline uptake and utilization	D-amino-acid oxidase (EC 1.4.3.3)
Amino Acids and Derivatives	Proline and 4-hydroxyproline	Proline Synthesis	Gamma-glutamyl phosphate reductase (EC 1.2.1.41)
Amino Acids and Derivatives	Proline and 4-hydroxyproline	Proline Synthesis	Glutamate 5-kinase (EC 2.7.2.11)
Amino Acids and Derivatives	Proline and 4-hydroxyproline	Proline Synthesis	RNA-binding C-terminal domain PUA
Amino Acids and Derivatives	no subcategory	Creatine and Creatinine Degradation	Creatinine amidohydrolase (EC 3.5.2.10)
Amino Acids and Derivatives	no subcategory	Creatine and Creatinine Degradation	N-methylhydantoinase B (EC 3.5.2.14)
Carbohydrates	Central carbohydrate metabolism	Dehydrogenase complexes	Dihydrolipoamide dehydrogenase of branched-chain alpha-keto acid dehydrogenase (EC 1.8.1.4)
Carbohydrates	Central carbohydrate metabolism	Glycolysis and Gluconeogenesis	Polyphosphate glucokinase (EC 2.7.1.63)
Carbohydrates	Central carbohydrate metabolism	Glycolysis and Gluconeogenesis	Pyrophosphate-dependent fructose 6-phosphate-1-kinase (EC 2.7.1.90)
Carbohydrates	Central carbohydrate metabolism	Pyruvate metabolism I: anaplerotic reactions, PEP	Malate Na(+) symporter
Carbohydrates	Central carbohydrate metabolism	TCA Cycle	Isocitrate dehydrogenase [NAD] (EC 1.1.1.41)
Carbohydrates	Di- and oligosaccharides	Maltose and Maltodextrin Utilization	Alpha-amylase (EC 3.2.1.1)
Carbohydrates	Di- and oligosaccharides	Maltose and Maltodextrin Utilization	Glucoamylase (EC 3.2.1.3)
Carbohydrates	Di- and oligosaccharides	Maltose and Maltodextrin Utilization	Malto-oligosyltrehalose synthase (EC 5.4.99.15)
Carbohydrates	Di- and oligosaccharides	Maltose and Maltodextrin Utilization	Predicted maltose transporter MalT
Carbohydrates	Di- and oligosaccharides	Trehalose Biosynthesis	Malto-oligosyltrehalose trehalohydrolase (EC 3.2.1.141)
Carbohydrates	Di- and oligosaccharides	Trehalose Biosynthesis	Trehalose synthase (EC 5.4.99.16)
Carbohydrates	Monosaccharides	D-Galacturonate and D-Glucuronate Utilization	Alpha-glucuronidase (EC 3.2.1.139)
Carbohydrates	Monosaccharides	D-Galacturonate and D-Glucuronate Utilization	Altronate oxidoreductase (EC 1.1.1.58)
Carbohydrates	Monosaccharides	D-Galacturonate and D-Glucuronate Utilization	D-mannonate oxidoreductase (EC 1.1.1.57)
Carbohydrates	Monosaccharides	D-Galacturonate and D-Glucuronate Utilization	Endo-1,4-beta-xylanase A precursor (EC 3.2.1.8)
Carbohydrates	Monosaccharides	D-Galacturonate and D-Glucuronate Utilization	Predicted D-mannonate epimerase
Carbohydrates	Monosaccharides	D-gluconate and ketogluconates metabolism	2,5-diketo-D-gluconic acid reductase B (EC 1.1.1.274)
Carbohydrates	Monosaccharides	D-gluconate and ketogluconates metabolism	5-keto-D-gluconate 5-reductase (EC 1.1.1.69)
Carbohydrates	Monosaccharides	D-gluconate and ketogluconates metabolism	Gluconate dehydratase (EC 4.2.1.39)
Carbohydrates	Monosaccharides	D-gluconate and ketogluconates metabolism	Glucose dehydrogenase, PQQ-dependent (EC 1.1.5.2)
Carbohydrates	Monosaccharides	D-ribose utilization	Ribose ABC transport system, ATP-binding protein RbsA (TC 3.A.1.2.1)
Carbohydrates	Monosaccharides	D-ribose utilization	Ribose ABC transport system, permease protein RbsC (TC 3.A.1.2.1)
Carbohydrates	Monosaccharides	D-ribose utilization	Ribose operon repressor
Carbohydrates	Monosaccharides	Deoxyribose and Deoxynucleoside Catabolism	Phosphopentomutase (EC 5.4.2.7)
Carbohydrates	Monosaccharides	Mannose Metabolism	Alpha-1,2-mannosidase
Carbohydrates	Monosaccharides	Mannose Metabolism	D-mannose isomerase (EC 5.3.1.7)
Carbohydrates	Monosaccharides	Mannose Metabolism	Mannose-1-phosphate guanylyltransferase (GDP) (EC 2.7.7.22)
Carbohydrates	One-carbon Metabolism	Serine-glyoxylate cycle	Phosphoglyceromutase
Carbohydrates	One-carbon Metabolism	Serine-glyoxylate cycle	Propionyl-CoA carboxylase beta chain (EC 6.4.1.3)
Carbohydrates	One-carbon Metabolism	Serine-glyoxylate cycle	Putative malate dehydrogenase (EC 1.1.1.37), similar to archaeal MJ1425
Carbohydrates	One-carbon Metabolism	Serine-glyoxylate cycle	low-specificity D-threonine aldolase
Carbohydrates	Organic acids	Lactate utilization	L-lactate dehydrogenase (EC 1.1.2.3)
Carbohydrates	Polysaccharides	Glycogen metabolism	Predicted glycogen synthase, ADP-glucose transglucosylase (EC 2.4.1.21), Actinobacterial type
Carbohydrates	Sugar alcohols	Glycerol and Glycerol-3-phosphate Uptake and Utilization	GlpG protein (membrane protein of glp regulon)
Carbohydrates	Sugar alcohols	Glycerol and Glycerol-3-phosphate Uptake and Utilization	Glycerol kinase (EC 2.7.1.30)
Carbohydrates	Sugar alcohols	Glycerol and Glycerol-3-phosphate Uptake and Utilization	Glycerol uptake facilitator protein
Carbohydrates	Sugar alcohols	Inositol catabolism	Inositol oxygenase (EC 1.13.99.1)
Carbohydrates	Sugar alcohols	Inositol catabolism	Inositol transport system sugar-binding protein
Carbohydrates	Sugar alcohols	Inositol catabolism	Inosose isomerase (EC 5.3.99.-)
Carbohydrates	Sugar alcohols	Inositol catabolism	Myo-inositol 2-dehydrogenase (EC 1.1.1.18)
Cell Wall and Capsule	Capsular and extracellular polysacchrides	Rhamnose containing glycans	capsular polysaccharide biosynthesis protein
Cell Wall and Capsule	Capsular and extracellular polysacchrides	dTDP-rhamnose synthesis	dTDP-Rha:A-D-GlcNAc-diphosphoryl polyprenol, A-3-L-rhamnosyl transferase WbbL
Cell Wall and Capsule	no subcategory	Recycling of Peptidoglycan Amino Sugars	Anhydro-N-acetylmuramic acid kinase (EC 2.7.1.-)
Clustering-based subsystems	Cytochrome biogenesis	CBSS-196164.1.peg.461	Glutamate-1-semialdehyde aminotransferase (EC 5.4.3.8)
Clustering-based subsystems	DNA polymerase III epsilon cluster	CBSS-342610.3.peg.1536	Predicted signal-transduction protein containing cAMP-binding and CBS domains
Clustering-based subsystems	May be related to ADP-phosphoribose and NAD-dependent acetylation	CBSS-216591.1.peg.168	Histone acetyltransferase HPA2 and related acetyltransferases
Clustering-based subsystems	Molybdopterin oxidoreductase	CBSS-269799.3.peg.2220	ABC-type Fe3+ transport system protein
Clustering-based subsystems	Molybdopterin oxidoreductase	CBSS-269799.3.peg.2220	Molybdenum transport protein, putative
Clustering-based subsystems	Molybdopterin oxidoreductase	CBSS-269799.3.peg.2220	Molybdopterin oxidoreductase subunit, predicted
Clustering-based subsystems	Molybdopterin oxidoreductase	CBSS-269799.3.peg.2220	Molybdopterin oxidoreductase, iron-sulfur binding subunit (EC 1.2.7.-)
Clustering-based subsystems	Molybdopterin oxidoreductase	CBSS-269799.3.peg.2220	Putative uncharacterized protein TTHA1760
Clustering-based subsystems	Probably GTP or GMP signaling related	CBSS-176299.4.peg.1292	DNA-directed RNA polymerase omega subunit (EC 2.7.7.6)
Clustering-based subsystems	Recombination related cluster	CBSS-198094.1.peg.4426	DNA polymerase X family
Clustering-based subsystems	Sulfatases and sulfatase modifying factor 1 (and a hypothetical)	Sulfatases and sulfatase modifying factor 1	Choline-sulfatase (EC 3.1.6.6)
Clustering-based subsystems	Sulfatases and sulfatase modifying factor 1 (and a hypothetical)	Sulfatases and sulfatase modifying factor 1	Sulfatase modifying factor 1 precursor (C-alpha-formyglycine- generating enzyme 1)
Clustering-based subsystems	no subcategory	CBSS-211586.1.peg.2832	Protein-export membrane protein SecD (TC 3.A.5.1.1)
Clustering-based subsystems	no subcategory	CBSS-228410.1.peg.134	DNA polymerase III epsilon subunit (EC 2.7.7.7)
Clustering-based subsystems	no subcategory	CBSS-316057.3.peg.563	TldD protein, part of TldE/TldD proteolytic complex
Clustering-based subsystems	no subcategory	CBSS-323097.3.peg.2594	FIG004453: protein YceG like
Clustering-based subsystems	no subcategory	CBSS-323097.3.peg.2594	Protein YicC
Clustering-based subsystems	no subcategory	CBSS-336982.3.peg.1011	FIG024850: short form Mg-chelase associated protein with vWA domain
Clustering-based subsystems	no subcategory	CBSS-336982.3.peg.1011	Magnesium chelatase, subunit ChlI (EC 6.6.1.1)
Clustering-based subsystems	no subcategory	CBSS-366602.3.peg.5141	Heparinase II/III-like
Clustering-based subsystems	no subcategory	CBSS-469378.4.peg.430	FIG002344: Hydrolase (HAD superfamily)
Clustering-based subsystems	no subcategory	CBSS-56780.10.peg.1536	Magnesium and cobalt efflux protein CorC
Clustering-based subsystems	no subcategory	ClpAS cluster	ATP-dependent Clp protease ATP-binding subunit ClpA
Clustering-based subsystems	no subcategory	ClpAS cluster	ATP-dependent Clp protease adaptor protein ClpS
Clustering-based subsystems	no subcategory	LMPTP YfkJ cluster	Low molecular weight protein tyrosine phosphatase (EC 3.1.3.48)
Cofactors, Vitamins, Prosthetic Groups, Pigments	Biotin	Biotin biosynthesis	Substrate-specific component BioY of biotin ECF transporter
Cofactors, Vitamins, Prosthetic Groups, Pigments	Folate and pterines	5-FCL-like protein	Alcohol dehydrogenase (EC 1.1.1.1)
Cofactors, Vitamins, Prosthetic Groups, Pigments	Folate and pterines	5-FCL-like protein	Butyryl-CoA dehydrogenase (EC 1.3.8.1)
Cofactors, Vitamins, Prosthetic Groups, Pigments	Folate and pterines	5-FCL-like protein	Dihydrolipoamide dehydrogenase (EC 1.8.1.4)
Cofactors, Vitamins, Prosthetic Groups, Pigments	Folate and pterines	5-FCL-like protein	Formyltetrahydrofolate deformylase (EC 3.5.1.10)
Cofactors, Vitamins, Prosthetic Groups, Pigments	Folate and pterines	Folate biosynthesis cluster	transmembrane protein, distant homology with ydbS
Cofactors, Vitamins, Prosthetic Groups, Pigments	NAD and NADP	NAD and NADP cofactor biosynthesis global	Kynureninase (EC 3.7.1.3)
Cofactors, Vitamins, Prosthetic Groups, Pigments	Quinone cofactors	Menaquinone and Phylloquinone Biosynthesis	2-succinyl-6-hydroxy-2,4-cyclohexadiene-1-carboxylate synthase (EC 4.2.99.20)
Cofactors, Vitamins, Prosthetic Groups, Pigments	Tetrapyrroles	Heme and Siroheme Biosynthesis	Uroporphyrinogen III decarboxylase (EC 4.1.1.37)
DNA Metabolism	CRISPs	CRISPRs	CRISPR-associated protein, Cas5d family
DNA Metabolism	CRISPs	CRISPRs	CRISPR-associated protein, Csd1 family
DNA Metabolism	DNA repair	DNA Repair Base Excision	DNA-3-methyladenine glycosylase II (EC 3.2.2.21)
DNA Metabolism	DNA repair	DNA repair, bacterial	Methylated-DNA--protein-cysteine methyltransferase (EC 2.1.1.63)
DNA Metabolism	DNA repair	DNA repair, bacterial MutL-MutS system	MutS-related protein, family 1
DNA Metabolism	DNA repair	DNA repair, bacterial UmuCD system	Error-prone repair protein UmuD
DNA Metabolism	DNA repair	DNA repair, bacterial UmuCD system	Error-prone, lesion bypass DNA polymerase V (UmuC)
DNA Metabolism	DNA replication	DNA-replication	ATP-dependent DNA helicase RecQ
DNA Metabolism	DNA replication	DNA-replication	Helicase PriA essential for oriC/DnaA-independent DNA replication
DNA Metabolism	no subcategory	Restriction-Modification System	Putative predicted metal-dependent hydrolase
DNA Metabolism	no subcategory	Restriction-Modification System	Type I restriction-modification system, DNA-methyltransferase subunit M (EC 2.1.1.72)
DNA Metabolism	no subcategory	Restriction-Modification System	Type I restriction-modification system, specificity subunit S (EC 3.1.21.3)
Dormancy and Sporulation	no subcategory	Persister Cells	Cell division inhibitor
Fatty Acids, Lipids, and Isoprenoids	Phospholipids	Cardiolipin synthesis	Cardiolipin synthetase (EC 2.7.8.-)
Fatty Acids, Lipids, and Isoprenoids	Phospholipids	Glycerolipid and Glycerophospholipid Metabolism in Bacteria	Aldehyde dehydrogenase (EC 1.2.1.3)
Fatty Acids, Lipids, and Isoprenoids	Phospholipids	Glycerolipid and Glycerophospholipid Metabolism in Bacteria	Phosphatidate cytidylyltransferase (EC 2.7.7.41)
Fatty Acids, Lipids, and Isoprenoids	Triacylglycerols	Triacylglycerol metabolism	Lysophospholipase (EC 3.1.1.5)
Fatty Acids, Lipids, and Isoprenoids	Triacylglycerols	Triacylglycerol metabolism	Monoglyceride lipase (EC 3.1.1.23)
Fatty Acids, Lipids, and Isoprenoids	no subcategory	Polyhydroxybutyrate metabolism	D-beta-hydroxybutyrate dehydrogenase (EC 1.1.1.30)
Iron acquisition and metabolism	no subcategory	Heme, hemin uptake and utilization systems in GramPositives	Hemin transport protein HmuS
Iron acquisition and metabolism	no subcategory	Hemin transport system	Periplasmic hemin-binding protein
Membrane Transport	Cation transporters	Copper Transport System	Repressor CsoR of the copZA operon
Membrane Transport	Protein secretion system, Type VI	Type VI secretion systems	IcmF-related protein
Membrane Transport	Protein secretion system, Type VI	Type VI secretion systems	Protein ImpG/VasA
Membrane Transport	Protein secretion system, Type VI	Type VI secretion systems	Uncharacterized protein ImpB
Membrane Transport	Protein secretion system, Type VI	Type VI secretion systems	Uncharacterized protein ImpC
Membrane Transport	Protein secretion system, Type VI	Type VI secretion systems	Uncharacterized protein ImpH/VasB
Membrane Transport	Protein secretion system, Type VI	Type VI secretion systems	Uncharacterized protein similar to VCA0109
Membrane Transport	Protein secretion system, Type VI	Type VI secretion systems	VgrG protein
Membrane Transport	Uni- Sym- and Antiporters	NhaA, NhaD and Sodium-dependent phosphate transporters	Sodium-dependent phosphate transporter
Membrane Transport	no subcategory	Ton and Tol transport systems	Outer membrane lipoprotein omp16 precursor
Membrane Transport	no subcategory	Tricarboxylate transport system	Tricarboxylate transport membrane protein TctA
Membrane Transport	no subcategory	Tricarboxylate transport system	Tricarboxylate transport protein TctC
Metabolism of Aromatic Compounds	Metabolism of central aromatic intermediates	Homogentisate pathway of aromatic compound degradation	Fumarylacetoacetase (EC 3.7.1.2)
Metabolism of Aromatic Compounds	Metabolism of central aromatic intermediates	Homogentisate pathway of aromatic compound degradation	Homogentisate 1,2-dioxygenase (EC 1.13.11.5)
Metabolism of Aromatic Compounds	Peripheral pathways for catabolism of aromatic compounds	Biphenyl Degradation	biphenyl-2,3-diol 1,2-dioxygenase III-related protein
Miscellaneous	Plant-Prokaryote DOE project	Scaffold proteins for [4Fe-4S] cluster assembly (MRP family)	Iron-sulfur cluster-binding protein
Miscellaneous	no subcategory	Bacillus subtilis scratch - gjo	ATP-dependent DNA ligase (EC 6.5.1.1) clustered with Ku protein, LigD
Miscellaneous	no subcategory	DedA family of inner membrane proteins	DedA protein
Motility and Chemotaxis	Flagellar motility in Prokaryota	Flagellar motility	Flagellar biosynthesis protein FlhF
Motility and Chemotaxis	Flagellar motility in Prokaryota	Flagellar motility	Flagellar motor switch protein FliM
Motility and Chemotaxis	Flagellar motility in Prokaryota	Flagellar motility	Flagellar synthesis regulator FleN
Motility and Chemotaxis	Flagellar motility in Prokaryota	Flagellar motility	RNA polymerase sigma-54 factor RpoN
Motility and Chemotaxis	Flagellar motility in Prokaryota	Flagellar motility	Signal transduction histidine kinase CheA (EC 2.7.3.-)
Nucleosides and Nucleotides	Detoxification	Nudix proteins (nucleoside triphosphate hydrolases)	Hypothetical nudix hydrolase YeaB
Nucleosides and Nucleotides	Purines	Purine conversions	5&#39;-nucleotidase (EC 3.1.3.5)
Nucleosides and Nucleotides	Purines	Purine conversions	dNTP triphosphohydrolase, putative
Nucleosides and Nucleotides	Pyrimidines	pyrimidine conversions	Cytidine deaminase (EC 3.5.4.5)
Nucleosides and Nucleotides	no subcategory	Hydantoin metabolism	Beta-ureidopropionase (EC 3.5.1.6)
Nucleosides and Nucleotides	no subcategory	Ribonucleotide reduction	Ribonucleotide reductase of class II (coenzyme B12-dependent) (EC 1.17.4.1)
Phages, Prophages, Transposable elements, Plasmids	Phages, Prophages	Phage replication	DNA primase/helicase, phage-associated
Phosphorus Metabolism	no subcategory	High affinity phosphate transporter and control of PHO regulon	Phosphate regulon sensor protein PhoR (SphS) (EC 2.7.13.3)
Phosphorus Metabolism	no subcategory	High affinity phosphate transporter and control of PHO regulon	Phosphate regulon transcriptional regulatory protein PhoB (SphR)
Phosphorus Metabolism	no subcategory	Phosphate metabolism	Inorganic pyrophosphatase (EC 3.6.1.1)
Potassium metabolism	no subcategory	Potassium homeostasis	Osmosensitive K+ channel histidine kinase KdpD (EC 2.7.3.-)
Potassium metabolism	no subcategory	Potassium homeostasis	Potassium efflux system KefA protein
Protein Metabolism	Protein biosynthesis	Programmed frameshift	Peptide chain release factor 2
Protein Metabolism	Protein biosynthesis	Programmed frameshift	programmed frameshift-containing
Protein Metabolism	Protein biosynthesis	rRNAs	5S rRNA
Protein Metabolism	Protein biosynthesis	tRNA aminoacylation, Asp and Asn	Aspartyl-tRNA(Asn) synthetase (EC 6.1.1.23)
Protein Metabolism	Protein biosynthesis	tRNA aminoacylation, Glu and Gln	Glutaminyl-tRNA synthetase (EC 6.1.1.18)
Protein Metabolism	Protein degradation	Aminopeptidases (EC 3.4.11.-)	Membrane alanine aminopeptidase N (EC 3.4.11.2)
Protein Metabolism	Protein degradation	Metallocarboxypeptidases (EC 3.4.17.-)	Muramoyltetrapeptide carboxypeptidase (EC 3.4.17.13)
Protein Metabolism	Protein degradation	Proteasome bacterial	ATP-dependent Clp protease ATP-binding subunit ClpX
Protein Metabolism	Protein degradation	Serine endopeptidase (EC 3.4.21.-)	Prolyl endopeptidase (EC 3.4.21.26)
Protein Metabolism	Protein processing and modification	G3E family of P-loop GTPases (metallocenter biosynthesis)	FKBP-type peptidyl-prolyl cis-trans isomerase SlyD (EC 5.2.1.8)
Protein Metabolism	Protein processing and modification	G3E family of P-loop GTPases (metallocenter biosynthesis)	Putative metal chaperone, involved in Zn homeostasis, GTPase of COG0523 family
Protein Metabolism	Protein processing and modification	G3E family of P-loop GTPases (metallocenter biosynthesis)	putative periplasmic protein kinase ArgK and related GTPases of G3E family
Protein Metabolism	Protein processing and modification	N-linked Glycosylation in Bacteria	Lipid carrier : UDP-N-acetylgalactosaminyltransferase (EC 2.4.1.-)
Protein Metabolism	Protein processing and modification	N-linked Glycosylation in Bacteria	Phospholipid-lipopolysaccharide ABC transporter
Protein Metabolism	Protein processing and modification	N-linked Glycosylation in Bacteria	UDP-N-acetylglucosamine 4,6-dehydratase (EC 4.2.1.-)
Protein Metabolism	Selenoproteins	Selenocysteine metabolism	Selenide,water dikinase (EC 2.7.9.3)
Protein Metabolism	Selenoproteins	Selenocysteine metabolism	Selenophosphate-dependent tRNA 2-selenouridine synthase
RNA Metabolism	RNA processing and modification	16S rRNA modification within P site of ribosome	BH2577 unknown conserved protein in B. subtilis
RNA Metabolism	RNA processing and modification	16S rRNA modification within P site of ribosome	Penicillin-binding protein 2B
RNA Metabolism	RNA processing and modification	Queuosine-Archaeosine Biosynthesis	Peptidyl-prolyl cis-trans isomerase (EC 5.2.1.8)
RNA Metabolism	RNA processing and modification	Queuosine-Archaeosine Biosynthesis	glutamyl-Q-tRNA synthetase
RNA Metabolism	RNA processing and modification	RNA pseudouridine syntheses	tRNA pseudouridine synthase C (EC 4.2.1.70)
RNA Metabolism	RNA processing and modification	Ribonucleases in Bacillus	Metallo-beta-lactamase family protein, RNA-specific
RNA Metabolism	Transcription	Transcription initiation, bacterial sigma factors	RNA polymerase sigma factor SigZ
RNA Metabolism	Transcription	Transcription initiation, bacterial sigma factors	RNA polymerase sigma-70 factor
RNA Metabolism	no subcategory	Group II intron-associated genes	Retron-type RNA-directed DNA polymerase (EC 2.7.7.49)
Regulation and Cell signaling	no subcategory	cAMP signaling in bacteria	Adenylate cyclase (EC 4.6.1.1)
Respiration	Electron accepting reactions	Anaerobic respiratory reductases	Anaerobic dehydrogenases, typically selenocysteine-containing
Respiration	Electron accepting reactions	Anaerobic respiratory reductases	Ferredoxin reductase
Respiration	Electron accepting reactions	Anaerobic respiratory reductases	Flavodoxin reductases (ferredoxin-NADPH reductases) family 1
Respiration	Electron accepting reactions	Terminal cytochrome C oxidases	Cytochrome c oxidase subunit CcoN (EC 1.9.3.1)
Respiration	Electron accepting reactions	Terminal cytochrome C oxidases	Cytochrome c oxidase subunit CcoO (EC 1.9.3.1)
Respiration	Electron accepting reactions	Terminal cytochrome C oxidases	Cytochrome c oxidase subunit CcoP (EC 1.9.3.1)
Respiration	Electron accepting reactions	Terminal cytochrome d ubiquinol oxidases	Cytochrome d ubiquinol oxidase subunit I (EC 1.10.3.-)
Respiration	Electron accepting reactions	Terminal cytochrome d ubiquinol oxidases	Cytochrome d ubiquinol oxidase subunit II (EC 1.10.3.-)
Respiration	Electron accepting reactions	Terminal cytochrome d ubiquinol oxidases	Transport ATP-binding protein CydC
Respiration	Electron donating reactions	Carbon monoxide oxidation	Carbon monoxide dehydrogenase large chain (EC 1.2.99.2)
Respiration	Electron donating reactions	NADH ubiquinone oxidoreductase	NADH-ubiquinone oxidoreductase chain I (EC 1.6.5.3)
Respiration	no subcategory	Biogenesis of c-type cytochromes	Cytochrome c-type biogenesis protein CcmC, putative heme lyase for CcmE
Respiration	no subcategory	Biogenesis of cbb3-type cytochrome c oxidases	Type cbb3 cytochrome oxidase biogenesis protein CcoG, involved in Cu oxidation
Respiration	no subcategory	Biogenesis of cytochrome c oxidases	Copper metallochaperone, bacterial analog of Cox17 protein
Respiration	no subcategory	Quinone oxidoreductase family	Quinone oxidoreductase (EC 1.6.5.5)
Respiration	no subcategory	Soluble cytochromes and functionally related electron carriers	Cytochrome c551/c552
Secondary Metabolism	Plant Alkaloids	Alkaloid biosynthesis from L-lysine	Deoxyhypusine synthase (EC 2.5.1.46)
Stress Response	Oxidative stress	Glutathione: Non-redox reactions	Lactoylglutathione lyase (EC 4.4.1.5)
Stress Response	Oxidative stress	NADPH:quinone oxidoreductase 2	NADPH:quinone oxidoreductase 2
Stress Response	Oxidative stress	Oxidative stress	Ferroxidase (EC 1.16.3.1)
Stress Response	Oxidative stress	Oxidative stress	Iron-binding ferritin-like antioxidant protein
Stress Response	Oxidative stress	Oxidative stress	Non-specific DNA-binding protein Dps
Stress Response	Oxidative stress	Oxidative stress	Peroxidase (EC 1.11.1.7)
Stress Response	Oxidative stress	Oxidative stress	Superoxide dismutase [Cu-Zn] precursor (EC 1.15.1.1)
Stress Response	Oxidative stress	Oxidative stress	transcriptional regulator, Crp/Fnr family
Sulfur Metabolism	no subcategory	Galactosylceramide and Sulfatide metabolism	Arylsulfatase (EC 3.1.6.1)
Virulence, Disease and Defense	Resistance to antibiotics and toxic compounds	Arsenic resistance	Arsenical-resistance protein ACR3
Virulence, Disease and Defense	Resistance to antibiotics and toxic compounds	Beta-lactamase	Beta-lactamase
Virulence, Disease and Defense	Resistance to antibiotics and toxic compounds	Beta-lactamase	Beta-lactamase (EC 3.5.2.6)
Virulence, Disease and Defense	Resistance to antibiotics and toxic compounds	Beta-lactamase	Beta-lactamase class C and other penicillin binding proteins
Virulence, Disease and Defense	Resistance to antibiotics and toxic compounds	Cobalt-zinc-cadmium resistance	Cobalt/zinc/cadmium efflux RND transporter, membrane fusion protein, CzcB family
Virulence, Disease and Defense	Resistance to antibiotics and toxic compounds	Cobalt-zinc-cadmium resistance	Hypothetical protein involved in heavy metal export
Virulence, Disease and Defense	Resistance to antibiotics and toxic compounds	Cobalt-zinc-cadmium resistance	Transcriptional regulator, MerR family
Virulence, Disease and Defense	Resistance to antibiotics and toxic compounds	Copper homeostasis	Copper chaperone

## Sheet: Absent in S. ruber DSM 13855
Category	Subcategory	Subsystem	Role
Amino Acids and Derivatives	Alanine, serine, and glycine	Glycine and Serine Utilization	L-serine dehydratase, (PLP)-dependent (EC 4.3.1.17)
Amino Acids and Derivatives	Arginine; urea cycle, polyamines	Arginine and Ornithine Degradation	Agmatine deiminase (EC 3.5.3.12)
Amino Acids and Derivatives	Arginine; urea cycle, polyamines	Arginine and Ornithine Degradation	Biosynthetic arginine decarboxylase (EC 4.1.1.19)
Amino Acids and Derivatives	Aromatic amino acids and derivatives	Aromatic amino acid degradation	5-carboxymethyl-2-hydroxymuconate delta-isomerase (EC 5.3.3.10)
Amino Acids and Derivatives	Aromatic amino acids and derivatives	Chorismate: Intermediate for synthesis of Tryptophan, PAPA antibiotics, PABA, 3-hydroxyanthranilate and more.	Isochorismate synthase (EC 5.4.4.2)
Amino Acids and Derivatives	Aromatic amino acids and derivatives	Chorismate: Intermediate for synthesis of Tryptophan, PAPA antibiotics, PABA, 3-hydroxyanthranilate and more.	Tryptophan synthase beta chain like (EC 4.2.1.20)
Amino Acids and Derivatives	Aromatic amino acids and derivatives	Chorismate Synthesis	2-keto-3-deoxy-D-arabino-heptulosonate-7-phosphate synthase I beta (EC 2.5.1.54)
Amino Acids and Derivatives	Branched-chain amino acids	Branched-Chain Amino Acid Biosynthesis	Threonine dehydratase, catabolic (EC 4.3.1.19)
Amino Acids and Derivatives	Branched-chain amino acids	Leucine Degradation and HMG-CoA Metabolism	Acetoacetyl-CoA synthetase (EC 6.2.1.16)
Amino Acids and Derivatives	Branched-chain amino acids	Leucine Degradation and HMG-CoA Metabolism	Methylcrotonyl-CoA carboxylase biotin-containing subunit (EC 6.4.1.4)
Amino Acids and Derivatives	Branched-chain amino acids	Leucine Degradation and HMG-CoA Metabolism	Methylcrotonyl-CoA carboxylase carboxyl transferase subunit (EC 6.4.1.4)
Amino Acids and Derivatives	Glutamine, glutamate, aspartate, asparagine; ammonia assimilation	Glutamate and Aspartate uptake in Bacteria	Asparagine synthetase [glutamine-hydrolyzing] (EC 6.3.5.4)
Amino Acids and Derivatives	Glutamine, glutamate, aspartate, asparagine; ammonia assimilation	Glutamate and Aspartate uptake in Bacteria	Sodium/glutamate symport protein
Amino Acids and Derivatives	Glutamine, glutamate, aspartate, asparagine; ammonia assimilation	Glutamine, Glutamate, Aspartate and Asparagine Biosynthesis	Aspartate racemase (EC 5.1.1.13)
Amino Acids and Derivatives	Glutamine, glutamate, aspartate, asparagine; ammonia assimilation	Glutamine, Glutamate, Aspartate and Asparagine Biosynthesis	glutamine synthetase family protein
Amino Acids and Derivatives	Lysine, threonine, methionine, and cysteine	Cysteine Biosynthesis	Cystathionine gamma-lyase (EC 4.4.1.1)
Amino Acids and Derivatives	Lysine, threonine, methionine, and cysteine	Cysteine Biosynthesis	Sulfate permease, Trk-type
Amino Acids and Derivatives	Lysine, threonine, methionine, and cysteine	Cysteine Biosynthesis	Sulfite reductase [NADPH] hemoprotein beta-component (EC 1.8.1.2)
Amino Acids and Derivatives	Lysine, threonine, methionine, and cysteine	Methionine Biosynthesis	5-methyltetrahydrofolate--homocysteine methyltransferase (EC 2.1.1.13)
Amino Acids and Derivatives	Lysine, threonine, methionine, and cysteine	Methionine Biosynthesis	Cystathionine gamma-synthase (EC 2.5.1.48)
Amino Acids and Derivatives	Lysine, threonine, methionine, and cysteine	Methionine Biosynthesis	Methionine ABC transporter ATP-binding protein
Amino Acids and Derivatives	Proline and 4-hydroxyproline	Proline, 4-hydroxyproline uptake and utilization	D-amino-acid oxidase (EC 1.4.3.3)
Amino Acids and Derivatives	no subcategory	Creatine and Creatinine Degradation	Creatinine amidohydrolase (EC 3.5.2.10)
Amino Acids and Derivatives	no subcategory	Creatine and Creatinine Degradation	N-methylhydantoinase B (EC 3.5.2.14)
Carbohydrates	Central carbohydrate metabolism	Glycolysis and Gluconeogenesis	Glucose-6-phosphate isomerase, archaeal II (EC 5.3.1.9)
Carbohydrates	Central carbohydrate metabolism	Glycolysis and Gluconeogenesis	Polyphosphate glucokinase (EC 2.7.1.63)
Carbohydrates	Central carbohydrate metabolism	Glycolysis and Gluconeogenesis	Pyrophosphate-dependent fructose 6-phosphate-1-kinase (EC 2.7.1.90)
Carbohydrates	Central carbohydrate metabolism	Glycolysis and Gluconeogenesis	Pyruvate,phosphate dikinase (EC 2.7.9.1)
Carbohydrates	Central carbohydrate metabolism	Methylglyoxal Metabolism	Methylglyoxal synthase (EC 4.2.3.3)
Carbohydrates	Central carbohydrate metabolism	Pentose phosphate pathway	Transketolase (EC 2.2.1.1)
Carbohydrates	Central carbohydrate metabolism	Pyruvate:ferredoxin oxidoreductase	Pyruvate-flavodoxin oxidoreductase (EC 1.2.7.-)
Carbohydrates	Central carbohydrate metabolism	Pyruvate metabolism II: acetyl-CoA, acetogenesis from pyruvate	Acetate permease ActP (cation/acetate symporter)
Carbohydrates	Central carbohydrate metabolism	Pyruvate metabolism II: acetyl-CoA, acetogenesis from pyruvate	NAD-independent protein deacetylase AcuC
Carbohydrates	Di- and oligosaccharides	Lactose and Galactose Uptake and Utilization	Aldose 1-epimerase (EC 5.1.3.3)
Carbohydrates	Di- and oligosaccharides	Lactose and Galactose Uptake and Utilization	Galactokinase (EC 2.7.1.6)
Carbohydrates	Di- and oligosaccharides	Maltose and Maltodextrin Utilization	Alpha-amylase (EC 3.2.1.1)
Carbohydrates	Di- and oligosaccharides	Maltose and Maltodextrin Utilization	Glucoamylase (EC 3.2.1.3)
Carbohydrates	Di- and oligosaccharides	Maltose and Maltodextrin Utilization	Malto-oligosyltrehalose synthase (EC 5.4.99.15)
Carbohydrates	Di- and oligosaccharides	Maltose and Maltodextrin Utilization	Predicted maltose transporter MalT
Carbohydrates	Di- and oligosaccharides	Trehalose Biosynthesis	Trehalose synthase (EC 5.4.99.16)
Carbohydrates	Monosaccharides	D-Galacturonate and D-Glucuronate Utilization	2-dehydro-3-deoxyphosphogluconate aldolase (EC 4.1.2.14)
Carbohydrates	Monosaccharides	D-Galacturonate and D-Glucuronate Utilization	Alpha-glucosidase (EC 3.2.1.20)
Carbohydrates	Monosaccharides	D-Galacturonate and D-Glucuronate Utilization	Alpha-glucuronidase (EC 3.2.1.139)
Carbohydrates	Monosaccharides	D-Galacturonate and D-Glucuronate Utilization	Altronate oxidoreductase (EC 1.1.1.58)
Carbohydrates	Monosaccharides	D-Galacturonate and D-Glucuronate Utilization	D-mannonate oxidoreductase (EC 1.1.1.57)
Carbohydrates	Monosaccharides	D-Galacturonate and D-Glucuronate Utilization	Endo-1,4-beta-xylanase A precursor (EC 3.2.1.8)
Carbohydrates	Monosaccharides	D-Galacturonate and D-Glucuronate Utilization	Polygalacturonase (EC 3.2.1.15)
Carbohydrates	Monosaccharides	D-Galacturonate and D-Glucuronate Utilization	Predicted D-mannonate epimerase
Carbohydrates	Monosaccharides	D-Galacturonate and D-Glucuronate Utilization	Uronate isomerase (EC 5.3.1.12)
Carbohydrates	Monosaccharides	D-gluconate and ketogluconates metabolism	2,5-diketo-D-gluconic acid reductase B (EC 1.1.1.274)
Carbohydrates	Monosaccharides	D-gluconate and ketogluconates metabolism	5-keto-D-gluconate 5-reductase (EC 1.1.1.69)
Carbohydrates	Monosaccharides	D-gluconate and ketogluconates metabolism	Gluconate dehydratase (EC 4.2.1.39)
Carbohydrates	Monosaccharides	D-gluconate and ketogluconates metabolism	Glucose dehydrogenase, PQQ-dependent (EC 1.1.5.2)
Carbohydrates	Monosaccharides	D-ribose utilization	Ribose ABC transport system, ATP-binding protein RbsA (TC 3.A.1.2.1)
Carbohydrates	Monosaccharides	D-ribose utilization	Ribose ABC transport system, permease protein RbsC (TC 3.A.1.2.1)
Carbohydrates	Monosaccharides	D-ribose utilization	Ribose operon repressor
Carbohydrates	Monosaccharides	Mannose Metabolism	Alpha-1,2-mannosidase
Carbohydrates	Monosaccharides	Mannose Metabolism	D-mannose isomerase (EC 5.3.1.7)
Carbohydrates	Monosaccharides	Xylose utilization	Alpha-xylosidase (EC 3.2.1.-)
Carbohydrates	Monosaccharides	Xylose utilization	Xylanase
Carbohydrates	One-carbon Metabolism	Serine-glyoxylate cycle	Phosphoglyceromutase
Carbohydrates	One-carbon Metabolism	Serine-glyoxylate cycle	Putative malate dehydrogenase (EC 1.1.1.37), similar to archaeal MJ1425
Carbohydrates	Organic acids	Lactate utilization	L-lactate dehydrogenase (EC 1.1.2.3)
Carbohydrates	Sugar alcohols	Glycerol and Glycerol-3-phosphate Uptake and Utilization	GlpG protein (membrane protein of glp regulon)
Carbohydrates	Sugar alcohols	Glycerol and Glycerol-3-phosphate Uptake and Utilization	Glycerol uptake facilitator protein
Carbohydrates	Sugar alcohols	Inositol catabolism	Inositol oxygenase (EC 1.13.99.1)
Carbohydrates	Sugar alcohols	Inositol catabolism	Inositol transport system sugar-binding protein
Carbohydrates	Sugar alcohols	Inositol catabolism	Myo-inositol 2-dehydrogenase (EC 1.1.1.18)
Cell Wall and Capsule	Capsular and extracellular polysacchrides	Rhamnose containing glycans	capsular polysaccharide biosynthesis protein
Cell Wall and Capsule	Capsular and extracellular polysacchrides	dTDP-rhamnose synthesis	dTDP-Rha:A-D-GlcNAc-diphosphoryl polyprenol, A-3-L-rhamnosyl transferase WbbL
Cell Wall and Capsule	Gram-Negative cell wall components	Lipoprotein sorting system	Lipoprotein releasing system transmembrane protein LolE
Cell Wall and Capsule	no subcategory	Recycling of Peptidoglycan Amino Sugars	Anhydro-N-acetylmuramic acid kinase (EC 2.7.1.-)
Clustering-based subsystems	Clustering-based subsystems	CBSS-292415.3.peg.2341	Major facilitator superfamily (MFS) transporter
Clustering-based subsystems	DNA polymerase III epsilon cluster	CBSS-342610.3.peg.1536	Predicted signal-transduction protein containing cAMP-binding and CBS domains
Clustering-based subsystems	May be related to ADP-phosphoribose and NAD-dependent acetylation	CBSS-216591.1.peg.168	Histone acetyltransferase HPA2 and related acetyltransferases
Clustering-based subsystems	Probably GTP or GMP signaling related	CBSS-176299.4.peg.1292	DNA-directed RNA polymerase omega subunit (EC 2.7.7.6)
Clustering-based subsystems	Putative Isoquinoline 1-oxidoreductase subunit	CBSS-314267.3.peg.390	Isoquinoline 1-oxidoreductase alpha subunit (EC 1.3.99.16)
Clustering-based subsystems	Putative Isoquinoline 1-oxidoreductase subunit	CBSS-314267.3.peg.390	Isoquinoline 1-oxidoreductase beta subunit (EC 1.3.99.16)
Clustering-based subsystems	Recombination related cluster	CBSS-198094.1.peg.4426	DNA polymerase X family
Clustering-based subsystems	Sulfatases and sulfatase modifying factor 1 (and a hypothetical)	Sulfatases and sulfatase modifying factor 1	Choline-sulfatase (EC 3.1.6.6)
Clustering-based subsystems	Sulfatases and sulfatase modifying factor 1 (and a hypothetical)	Sulfatases and sulfatase modifying factor 1	Sulfatase modifying factor 1 precursor (C-alpha-formyglycine- generating enzyme 1)
Clustering-based subsystems	no subcategory	Aerotolerance operon in Bacteroides and potentially orthologous operons in other organisms	hypothetical protein PA3071
Clustering-based subsystems	no subcategory	CBSS-138119.3.peg.2719	FIG146085: 3&#39;-to-5&#39; oligoribonuclease A, Bacillus type
Clustering-based subsystems	no subcategory	CBSS-138119.3.peg.2719	tRNA pseudouridine synthase B (EC 4.2.1.70)
Clustering-based subsystems	no subcategory	CBSS-1806.1.peg.3045	FIG007959: peptidase, M16 family
Clustering-based subsystems	no subcategory	CBSS-211586.1.peg.2832	Protein-export membrane protein SecD (TC 3.A.5.1.1)
Clustering-based subsystems	no subcategory	CBSS-211586.1.peg.2832	tRNA-guanine transglycosylase (EC 2.4.2.29)
Clustering-based subsystems	no subcategory	CBSS-228410.1.peg.134	DNA polymerase III epsilon subunit (EC 2.7.7.7)
Clustering-based subsystems	no subcategory	CBSS-228410.1.peg.134	Hydroxyacylglutathione hydrolase (EC 3.1.2.6)
Clustering-based subsystems	no subcategory	CBSS-316057.3.peg.563	TldD protein, part of TldE/TldD proteolytic complex
Clustering-based subsystems	no subcategory	CBSS-336982.3.peg.1011	FIG024850: short form Mg-chelase associated protein with vWA domain
Clustering-based subsystems	no subcategory	CBSS-336982.3.peg.1011	Magnesium chelatase, subunit ChlI (EC 6.6.1.1)
Clustering-based subsystems	no subcategory	CBSS-366602.3.peg.5141	Heparinase II/III-like
Clustering-based subsystems	no subcategory	CBSS-469378.4.peg.430	FIG002344: Hydrolase (HAD superfamily)
Clustering-based subsystems	no subcategory	ClpAS cluster	ATP-dependent Clp protease adaptor protein ClpS
Cofactors, Vitamins, Prosthetic Groups, Pigments	Biotin	Biotin biosynthesis	8-amino-7-oxononanoate synthase (EC 2.3.1.47)
Cofactors, Vitamins, Prosthetic Groups, Pigments	Folate and pterines	5-FCL-like protein	Dihydrolipoamide dehydrogenase (EC 1.8.1.4)
Cofactors, Vitamins, Prosthetic Groups, Pigments	Folate and pterines	5-FCL-like protein	Formyltetrahydrofolate deformylase (EC 3.5.1.10)
Cofactors, Vitamins, Prosthetic Groups, Pigments	Folate and pterines	Folate biosynthesis cluster	transmembrane protein, distant homology with ydbS
Cofactors, Vitamins, Prosthetic Groups, Pigments	Quinone cofactors	Menaquinone and Phylloquinone Biosynthesis	2-succinyl-6-hydroxy-2,4-cyclohexadiene-1-carboxylate synthase (EC 4.2.99.20)
Cofactors, Vitamins, Prosthetic Groups, Pigments	Tetrapyrroles	Heme and Siroheme Biosynthesis	Precorrin-2 oxidase (EC 1.3.1.76)
DNA Metabolism	CRISPs	CRISPRs	CRISPR-associated helicase Cas3
DNA Metabolism	CRISPs	CRISPRs	CRISPR-associated protein Cas1
DNA Metabolism	CRISPs	CRISPRs	CRISPR-associated protein Cas2
DNA Metabolism	CRISPs	CRISPRs	CRISPR-associated protein, Cas5d family
DNA Metabolism	CRISPs	CRISPRs	CRISPR-associated protein, Csd1 family
DNA Metabolism	CRISPs	CRISPRs	CRISPR-associated protein, Cse4 family
DNA Metabolism	DNA repair	DNA repair, bacterial	Methylated-DNA--protein-cysteine methyltransferase (EC 2.1.1.63)
DNA Metabolism	DNA repair	DNA repair, bacterial MutL-MutS system	MutS-related protein, family 1
DNA Metabolism	DNA replication	DNA-replication	Helicase PriA essential for oriC/DnaA-independent DNA replication
DNA Metabolism	no subcategory	Restriction-Modification System	Putative predicted metal-dependent hydrolase
DNA Metabolism	no subcategory	Restriction-Modification System	Type I restriction-modification system, DNA-methyltransferase subunit M (EC 2.1.1.72)
DNA Metabolism	no subcategory	Restriction-Modification System	Type I restriction-modification system, restriction subunit R (EC 3.1.21.3)
Fatty Acids, Lipids, and Isoprenoids	Phospholipids	Cardiolipin synthesis	Cardiolipin synthetase (EC 2.7.8.-)
Fatty Acids, Lipids, and Isoprenoids	Phospholipids	Glycerolipid and Glycerophospholipid Metabolism in Bacteria	Aldehyde dehydrogenase B (EC 1.2.1.22)
Fatty Acids, Lipids, and Isoprenoids	no subcategory	Polyhydroxybutyrate metabolism	D-beta-hydroxybutyrate dehydrogenase (EC 1.1.1.30)
Iron acquisition and metabolism	no subcategory	Hemin transport system	Periplasmic hemin-binding protein
Membrane Transport	Cation transporters	Copper Transport System	Repressor CsoR of the copZA operon
Membrane Transport	Protein secretion system, Type VI	Type VI secretion systems	IcmF-related protein
Membrane Transport	Protein secretion system, Type VI	Type VI secretion systems	Protein ImpG/VasA
Membrane Transport	Protein secretion system, Type VI	Type VI secretion systems	Uncharacterized protein ImpB
Membrane Transport	Protein secretion system, Type VI	Type VI secretion systems	Uncharacterized protein ImpC
Membrane Transport	Protein secretion system, Type VI	Type VI secretion systems	Uncharacterized protein ImpH/VasB
Membrane Transport	Protein secretion system, Type VI	Type VI secretion systems	Uncharacterized protein similar to VCA0109
Membrane Transport	Protein secretion system, Type VI	Type VI secretion systems	VgrG protein
Membrane Transport	TRAP transporters	TRAP Transporter collection	TRAP-type C4-dicarboxylate transport system, large permease component
Membrane Transport	TRAP transporters	TRAP Transporter collection	TRAP-type C4-dicarboxylate transport system, periplasmic component
Membrane Transport	Uni- Sym- and Antiporters	NhaA, NhaD and Sodium-dependent phosphate transporters	Na+/H+ antiporter NhaA type
Membrane Transport	Uni- Sym- and Antiporters	NhaA, NhaD and Sodium-dependent phosphate transporters	Sodium-dependent phosphate transporter
Membrane Transport	no subcategory	Ton and Tol transport systems	Outer membrane lipoprotein omp16 precursor
Membrane Transport	no subcategory	Tricarboxylate transport system	Tricarboxylate transport membrane protein TctA
Membrane Transport	no subcategory	Tricarboxylate transport system	Tricarboxylate transport protein TctC
Metabolism of Aromatic Compounds	Metabolism of central aromatic intermediates	Homogentisate pathway of aromatic compound degradation	Homogentisate 1,2-dioxygenase (EC 1.13.11.5)
Metabolism of Aromatic Compounds	Peripheral pathways for catabolism of aromatic compounds	Biphenyl Degradation	biphenyl-2,3-diol 1,2-dioxygenase III-related protein
Miscellaneous	Plant-Prokaryote DOE project	Iron-sulfur cluster assembly	Thiamin biosynthesis lipoprotein ApbE
Miscellaneous	no subcategory	Bacillus subtilis scratch - gjo	ATP-dependent DNA ligase (EC 6.5.1.1) clustered with Ku protein, LigD
Nitrogen Metabolism	no subcategory	Ammonia assimilation	Glutamine synthetase type III, GlnN (EC 6.3.1.2)
Nucleosides and Nucleotides	Detoxification	Nudix proteins (nucleoside triphosphate hydrolases)	Hypothetical nudix hydrolase YeaB
Nucleosides and Nucleotides	Purines	Purine conversions	5&#39;-nucleotidase (EC 3.1.3.5)
Nucleosides and Nucleotides	Purines	Purine conversions	Adenine phosphoribosyltransferase (EC 2.4.2.7)
Nucleosides and Nucleotides	no subcategory	Hydantoin metabolism	Beta-ureidopropionase (EC 3.5.1.6)
Nucleosides and Nucleotides	no subcategory	Ribonucleotide reduction	Ribonucleotide reductase of class Ia (aerobic), alpha subunit (EC 1.17.4.1)
Phages, Prophages, Transposable elements, Plasmids	Phages, Prophages	Phage replication	DNA primase/helicase, phage-associated
Phosphorus Metabolism	no subcategory	High affinity phosphate transporter and control of PHO regulon	Phosphate regulon sensor protein PhoR (SphS) (EC 2.7.13.3)
Phosphorus Metabolism	no subcategory	High affinity phosphate transporter and control of PHO regulon	Polyphosphate kinase (EC 2.7.4.1)
Potassium metabolism	no subcategory	Potassium homeostasis	Large-conductance mechanosensitive channel
Potassium metabolism	no subcategory	Potassium homeostasis	Potassium voltage-gated channel subfamily KQT
Protein Metabolism	Protein biosynthesis	Programmed frameshift	Peptide chain release factor 2
Protein Metabolism	Protein biosynthesis	Programmed frameshift	programmed frameshift-containing
Protein Metabolism	Protein biosynthesis	Ribosome LSU bacterial	LSU ribosomal protein L30p (L7e)
Protein Metabolism	Protein biosynthesis	Ribosome LSU bacterial	LSU ribosomal protein L36p
Protein Metabolism	Protein biosynthesis	Universal GTPases	GTP-binding protein EngB
Protein Metabolism	Protein biosynthesis	rRNAs	5S rRNA
Protein Metabolism	Protein biosynthesis	tRNA aminoacylation, Asp and Asn	Aspartyl-tRNA(Asn) synthetase (EC 6.1.1.23)
Protein Metabolism	Protein biosynthesis	tRNAs	tRNA-Arg-ACG
Protein Metabolism	Protein degradation	Aminopeptidases (EC 3.4.11.-)	Cytosol aminopeptidase PepA (EC 3.4.11.1)
Protein Metabolism	Protein degradation	Proteasome bacterial	ATP-dependent Clp protease ATP-binding subunit ClpX
Protein Metabolism	Protein degradation	Proteasome bacterial	ATP-dependent protease La (EC 3.4.21.53) Type I
Protein Metabolism	Protein degradation	Serine endopeptidase (EC 3.4.21.-)	Prolyl endopeptidase (EC 3.4.21.26)
Protein Metabolism	Protein processing and modification	N-linked Glycosylation in Bacteria	Lipid carrier : UDP-N-acetylgalactosaminyltransferase (EC 2.4.1.-)
Protein Metabolism	Protein processing and modification	N-linked Glycosylation in Bacteria	Phospholipid-lipopolysaccharide ABC transporter
Protein Metabolism	Protein processing and modification	N-linked Glycosylation in Bacteria	UDP-N-acetylglucosamine 4,6-dehydratase (EC 4.2.1.-)
Protein Metabolism	Selenoproteins	Selenocysteine metabolism	Selenide,water dikinase (EC 2.7.9.3)
Protein Metabolism	Selenoproteins	Selenocysteine metabolism	Selenophosphate-dependent tRNA 2-selenouridine synthase
RNA Metabolism	RNA processing and modification	16S rRNA modification within P site of ribosome	Penicillin-binding protein 2B
RNA Metabolism	RNA processing and modification	Queuosine-Archaeosine Biosynthesis	Epoxyqueuosine (oQ) reductase QueG
RNA Metabolism	RNA processing and modification	Queuosine-Archaeosine Biosynthesis	Peptidyl-prolyl cis-trans isomerase (EC 5.2.1.8)
RNA Metabolism	RNA processing and modification	Queuosine-Archaeosine Biosynthesis	Permease of the drug/metabolite transporter (DMT) superfamily
RNA Metabolism	RNA processing and modification	Queuosine-Archaeosine Biosynthesis	Queuosine Biosynthesis QueE Radical SAM
RNA Metabolism	RNA processing and modification	Queuosine-Archaeosine Biosynthesis	glutamyl-Q-tRNA synthetase
RNA Metabolism	RNA processing and modification	RNA methylation	LSU m5C1962 methyltransferase RlmI
RNA Metabolism	RNA processing and modification	RNA methylation	tRNA (guanine46-N7-)-methyltransferase (EC 2.1.1.33)
RNA Metabolism	RNA processing and modification	RNA pseudouridine syntheses	Ribosomal large subunit pseudouridine synthase B (EC 4.2.1.70)
RNA Metabolism	RNA processing and modification	RNA pseudouridine syntheses	Ribosomal large subunit pseudouridine synthase E (EC 4.2.1.70)
RNA Metabolism	RNA processing and modification	RNA pseudouridine syntheses	tRNA pseudouridine synthase C (EC 4.2.1.70)
RNA Metabolism	RNA processing and modification	Ribonucleases in Bacillus	Metallo-beta-lactamase family protein, RNA-specific
RNA Metabolism	RNA processing and modification	tRNA modification Bacteria	tRNA-specific adenosine-34 deaminase (EC 3.5.4.-)
RNA Metabolism	Transcription	Transcription initiation, bacterial sigma factors	RNA polymerase sigma factor SigZ
RNA Metabolism	Transcription	Transcription initiation, bacterial sigma factors	RNA polymerase sigma-70 factor
RNA Metabolism	no subcategory	Group II intron-associated genes	Retron-type RNA-directed DNA polymerase (EC 2.7.7.49)
Regulation and Cell signaling	no subcategory	HPr catabolite repression system	Phosphotransferase system, phosphocarrier protein HPr
Regulation and Cell signaling	no subcategory	cAMP signaling in bacteria	Adenylate cyclase (EC 4.6.1.1)
Respiration	Electron accepting reactions	Anaerobic respiratory reductases	Anaerobic dehydrogenases, typically selenocysteine-containing
Respiration	Electron accepting reactions	Anaerobic respiratory reductases	Ferredoxin reductase
Respiration	Electron accepting reactions	Anaerobic respiratory reductases	Flavodoxin reductases (ferredoxin-NADPH reductases) family 1
Respiration	Electron accepting reactions	Terminal cytochrome C oxidases	Cytochrome c oxidase subunit CcoN (EC 1.9.3.1)
Respiration	Electron accepting reactions	Terminal cytochrome C oxidases	Cytochrome c oxidase subunit CcoP (EC 1.9.3.1)
Respiration	Electron accepting reactions	Terminal cytochrome d ubiquinol oxidases	Cytochrome d ubiquinol oxidase subunit I (EC 1.10.3.-)
Respiration	Electron accepting reactions	Terminal cytochrome d ubiquinol oxidases	Cytochrome d ubiquinol oxidase subunit II (EC 1.10.3.-)
Respiration	Electron accepting reactions	Terminal cytochrome d ubiquinol oxidases	Transport ATP-binding protein CydC
Respiration	Electron donating reactions	Carbon monoxide oxidation	CTP:molybdopterin cytidylyltransferase
Respiration	Electron donating reactions	Carbon monoxide oxidation	Carbon monoxide dehydrogenase large chain (EC 1.2.99.2)
Respiration	Electron donating reactions	Carbon monoxide oxidation	Carbon monoxide dehydrogenase medium chain (EC 1.2.99.2)
Respiration	Electron donating reactions	Carbon monoxide oxidation	Carbon monoxide dehydrogenase small chain (EC 1.2.99.2)
Respiration	Electron donating reactions	Carbon monoxide oxidation	Xanthine and CO dehydrogenases maturation factor, XdhC/CoxF family
Respiration	no subcategory	Biogenesis of c-type cytochromes	Cytochrome c-type biogenesis protein CcmC, putative heme lyase for CcmE
Respiration	no subcategory	Biogenesis of cbb3-type cytochrome c oxidases	Type cbb3 cytochrome oxidase biogenesis protein CcoG, involved in Cu oxidation
Respiration	no subcategory	Biogenesis of cytochrome c oxidases	Copper metallochaperone, bacterial analog of Cox17 protein
Respiration	no subcategory	Biogenesis of cytochrome c oxidases	Cytochrome oxidase biogenesis protein Sco1/SenC/PrrC, putative copper metallochaperone
Respiration	no subcategory	Carbon monoxide dehydrogenase maturation factors	Aerobic carbon monoxide dehydrogenase molybdenum cofactor insertion protein CoxF
Respiration	no subcategory	Quinone oxidoreductase family	Quinone oxidoreductase (EC 1.6.5.5)
Respiration	no subcategory	Soluble cytochromes and functionally related electron carriers	Cytochrome c551/c552
Secondary Metabolism	Plant Alkaloids	Alkaloid biosynthesis from L-lysine	Deoxyhypusine synthase (EC 2.5.1.46)
Stress Response	Heat shock	Heat shock dnaK gene cluster extended	tRNA-t(6)A37 methylthiotransferase
Stress Response	Oxidative stress	NADPH:quinone oxidoreductase 2	NADPH:quinone oxidoreductase 2
Stress Response	Oxidative stress	Oxidative stress	Superoxide dismutase [Cu-Zn] precursor (EC 1.15.1.1)
Stress Response	Oxidative stress	Oxidative stress	transcriptional regulator, Crp/Fnr family
Stress Response	Periplasmic Stress	Periplasmic Stress Response	HtrA protease/chaperone protein
Sulfur Metabolism	no subcategory	Galactosylceramide and Sulfatide metabolism	Arylsulfatase (EC 3.1.6.1)
Sulfur Metabolism	no subcategory	Galactosylceramide and Sulfatide metabolism	Beta-galactosidase (EC 3.2.1.23)
Sulfur Metabolism	no subcategory	Thioredoxin-disulfide reductase	Thiol peroxidase, Bcp-type (EC 1.11.1.15)
Virulence, Disease and Defense	Resistance to antibiotics and toxic compounds	Beta-lactamase	Beta-lactamase class C and other penicillin binding proteins
Virulence, Disease and Defense	Resistance to antibiotics and toxic compounds	Cobalt-zinc-cadmium resistance	Cobalt-zinc-cadmium resistance protein
Virulence, Disease and Defense	Resistance to antibiotics and toxic compounds	Cobalt-zinc-cadmium resistance	Cobalt/zinc/cadmium efflux RND transporter, membrane fusion protein, CzcB family
Virulence, Disease and Defense	Resistance to antibiotics and toxic compounds	Cobalt-zinc-cadmium resistance	Heavy metal RND efflux outer membrane protein, CzcC family
Virulence, Disease and Defense	Resistance to antibiotics and toxic compounds	Cobalt-zinc-cadmium resistance	Hypothetical protein involved in heavy metal export
Virulence, Disease and Defense	Resistance to antibiotics and toxic compounds	Cobalt-zinc-cadmium resistance	Transcriptional regulator, MerR family
Virulence, Disease and Defense	Resistance to antibiotics and toxic compounds	Copper homeostasis	Copper chaperone
Virulence, Disease and Defense	Resistance to antibiotics and toxic compounds	Copper homeostasis	Copper resistance protein B
Virulence, Disease and Defense	Resistance to antibiotics and toxic compounds	Copper homeostasis	Multicopper oxidase
Virulence, Disease and Defense	Resistance to antibiotics and toxic compounds	Resistance to chromium compounds	Chromate transport protein ChrA
