# Supplementary material for: Genome Analysis of a New Rhodothermaceae Strain Isolated from a Hot Spring
Source: Front Microbiol. 2016 Jul 14;7:1109. doi: 10.3389/fmicb.2016.01109 (PMC4943939; doi:10.3389/fmicb.2016.01109)
Supplement: Supplementary file 2 [file DataSheet2.XLSX]

## Sheet: Sheet1
Protein description	Amino acid sequence
Glycerol uptake facilitator protein	MPPFIAEFIGTLLLILLGDGVVANVVLRHTKGHNGGWIVITFGWAMGVFVAVFVVAAFSGAHINPAVTLGLALTGAFPWGQVPSYLLAQFLGAAAGATLVWLHYRDHFAATEDADAKLAVFCTGPAIRRPVSNLVSEVIGTFVLVLAVLYLAAPNVAAPGGGPGGLGALDALPVGLLVLAIGLSLGGTTGYAINPARDLSPRLMHALLPIPDKRDSDWGYAWIPVVGPVLGGALAALVFLALG
probable sodium:solute symporter	MPTTLIGVFGYVLVQLGIGLYVSRRIRTEDDYLIAGRQLGYGLGTFTIFATWFGAETCIGAAGAIYEQGLSGGTADPFGYGVCLLLMGFVFAVPLWRHKLTTLADLFRRRYSAGVERLAVVLMVPTSLLWAAAQVRAFGQVLSASSGLELSLTISLAALVVIAYTIFGGLLADAWTDLIQGLAMAVGLVVLVVVVLRDVGLEAVTAIDPARLSVVGSADVPWLLIVEDWAIPICGSVMAAELVARVIATRSPQVARRSTLMAGGLYLALGGIPVLIGLLGFTLVPDLTHPEQILPAVARQYLSPLLYTLFAGALVSAILSTVDSALLVASSLVSHNLLVPLRPGLSEAGKVWLARAGVAVFGVLAYVMALFADGVYALVEEASAFGSAGIFIVILFGLF…
Osmotically inducible protein C	MKRTATALWKGNGPDGTGTLTTQSGVLKDQPYSARLRFQNEDGKAGTNPEELIAAAHAGCFAMALSFQLTNAGFTPEALHVDAAVTLEKTDGGFAIPAVHLTLKATVPGLDEKTFHELANVAKENCPVSKVLNADITLDATLA
sodium/hydrogen exchanger	MELSILNLLLVLLVAWVAGQLANRIGYPSVLGELLAGILLGPPLLGVLASSPALEVLAEAGILLMMFYIGMEIDPRELGRASRGGFLAAIGGFITPFVLCYLVIVAAGGSQMAGIFVGIAAGVTSLATKSRILVDLKLLDTRIAHVLMAGALIADTLSLVIFAGVLGVAEAGSLNLGSLGLVTLKAVGFFAVAALVGLKGFPVLGRYLRGVRSFTRTSNFMLLLIIAFAYAELAELAGMHGILGAFLAGLFLRESVLGRSMSKEIMDLVRDASIGFLAPLFFVTAGFAVSLEVFTADLGLLLGIIGLATAGKIVGTALFYLPTGHGWREGLTIGAGMNGRGAVEIIIAQIALTMGLIDQEIFSILVVMAIVTTATVPVFLKWGTDWLRRRGELVRSDQE…
Na+/H+ antiporter NhaA type	MQIQNTSSNTLVRAFQSFIRMEAAGGILLLVCAVIALIWANSPWATSYTDLFQTLVTVGAGSFAISKPLLLWINDGLMAIFFFLVGLEIKREVMVGELAAPKKAALAVAAAVGGMIVPALIYTALNFGTETASGWGIPMATDIAFALGVLALLGKRAPLALKVFLTAVAIVDDLGAVLVIAFFYTEQLSMGALGVGALFFVALLAVNRLGVRRTAVYVILGIGLWVAFLKSGVHATIAGVLLALTIPANRLIDVPTLAERVRSVLDVFTRGAQAGRHKMTEEQQDALHTMEDALEKAEAPLMRMEHALHGWVAFGIMPVFALANAGVALGGDIGAAFGNSVTLGIILGLVIGKQIGVTLFSWLAVRLGLAQLPGGISWRQIYGVSALCGIGFTMSLFIA…
putative sodium-dependent bicarbonate transporter	MQPLDILLANLLSPIVLAFVLGVVASVVRSDLKFPESLYTALSIYLLFAIGLKGGAELSQTPVTVFLGPALVTVALGILTPIIAYNVLRRTKRMDRANAAALAAHYGSVSAVTFIAAQAFGTLNGEPAEGYMPALVALLEVPAIVVALMIAFVRSKRVGSWRAALHEVLAGKSVVLLLGGLVIGLLAGKDGIEPVEPFFVSGFKGALTLFLLEMGMVAARRLRDLRTVGLYLVAFGVLLPIVHGALGVWAGTWAGMSIGGAAVLGAMVSSASYIAAPAAVRIALPEANPTYYLTASLGITFPFNLTLGIPLYFAIARWLAL
Choline-sulfatase (EC 3.1.6.6)	MMRIPYPDFRRFRACLMVWLGVLLLGGCESEPGETAPDEPLNILFLFADDQAYDALQALGDAQIVTPNLDRLVARGYTFTHAFNQGSWTGAVCVASRAMLNSGLYLYHARADMERVTQWGEAFRQAGYRTFITGKWHNTEAMLLRAFEEGVSIGRGMYETRGGPAGPGYRRPTPSNDTWSASDTTWLGHWQPTVYDIVATDSGAVRGEPYTVSRHTSELYADRALDFLDAYARQPDRPFFMYVAFNAPHDPRQAPQPYLEMYPVDEMALPPSYLPEHPFDQGERYTLRDEILAPFPRTERAVRTHRREYYAIISHMDAQIGRILDRLDALGLADRTLVVFTADHGLAVGRHGLMGKQNQYDHSIRVPLIFAGPGIEAGGHSDALVYLQSTFATTCELAG…
Sodium/glucose cotransporter 1	MTTLAPLDWIIIAGYFLLILGLAWWVIRQRTDTPTDYFLAGRHLGWFIVGASIFASNIGSEHLVGLAGSGATDGVAMAHYELHAWCLLVLGWVMVPFYMRAKVFTMPEFLERRFSPAARTLLSLISLVAYVLTKIAVGIFAGGIVFSVLMPDLNLFGLNSFWIGSVLVIVFTGIYTVLGGLRAVAYTEALQTIILVLGSFMVLIYGLKAIGGWDQLYAIVGSEMFNLWKPLVPEGFTATWAPVRTDDVMAWYFNDQYPWVGMLFCAPIVGLWYWTTDQYIVQRVLGAPNETEARRGSIAAALLKLLPVFIFIIPGIIAFALAKTGQVQALQEAMMDENGEIIRENAQAAFPLLVAHVLPVGVRGIVVAGLLAALMSSLAGVFNASSTLFTMDFYSRLRP…
Choline-sulfatase (EC 3.1.6.6)	MCFFAMSRLHFGLVLGGLFLCAACRSGSPDPALPPPNIVWISAEDLSPRLGAYGDTLARTPNLDRFAVQSLRYTRAFTTAGVCAPSRAAIITGMFQPAIGAHHMRTSHEAPHLPGPYEAVPPPHVKAFPEYLRAAGYYTTNNVKTDYQFGTPRTVWDENSRQAHWRNRPDPDQPFFAVFNFTVTHESQVWPRDKPVETDPAAVAVPPYYPDTPVVRRDLAQHYDNIATLDSLVGVILRQLEEDGLADNTVVFFWTDHGDGLPRAKRWLYDAGLHVPLMIRWPGQIEPGTTTDRLVSLMDLGPTVLSIAGVPIPGHMQGQAFLGEQAAPPRSYVYAARDRIDEAYDHVRAVRDARFKYIRNFMPDQPYILDVPYRNRMPTMQELLRLQASGQARGPVALW…
Inner membrane protein YrbG, predicted calcium/sodium:proton antiporter	MLLDLLIFVAGLVILYLGAEWLVRGAASLALEYGIRPLVVGLTVVALGTSMPEFVLNFFAVLSNEDSLALGNIVGSNICNIALILGTSAVVLPLTVAPGTLKREYAIMLLVTGVFYLVALDGVISQLDGLLLVAGLVAFVGYLIVDSRRRTEPPIPPAEDLPQAPGWKKALMLLGGVTFLAVGAHLMVTAAQSIAHQMGIDPVVVGLTVLAVGTSLPELAASVVSAIKKEADLSVGNVLGSNMLNVLFVVGLLALFKPMTVEPAAIQIHFPVMIAFSVLLFPLAWTGYRISRLEGGMLLTGFVGYIAYLVMPYV
Glucose-methanol-choline (GMC) oxidoreductase:NAD binding site	MQVIRRNEPYDVCIIGSGAGGSMAAKVLAEAGAKVVVLEAGPEWYPARDGNMFTWNYESPRRGASTPEKPFGEFDACIGGWEIDGEPYTKAPGTEWDWFRARQLGGRTYHWGRISLRFGPDDFRRRSIDGLGDDWPIGYDDLKPYYDRVDRLVGIFGSVEGIYNEPDGIFLPPPRPRAYELAAAKACRKLGIPIIPSRLSIITRAHNGRPACHYCSQCGRGCTTNSNFAAPPVLLDPARATGNVEVIAHAMAREVLTNREGLATGVSYVNTQDLQEYQVRARVVVLAASACESARLLLNSTSARFPNGLANGSGTVGKYLMDSTGLDVAGFIPQLMDLPVYNEDGVGGMHVYVPWWLEKAKLDFPRGYHIEIWGGRGMPSYGFGSGIHRINGLVGDRPR…
Choline-sulfatase (EC 3.1.6.6)	MPAPLRPTPAWTLPALLVLLVLLPASGRPPVQEAPPNILVLVADDLGWFDSGPYGNPVVRTPNLDRLAASGLRVDQAFLTIAQCSPSRISILSGRYPHQTGAEDLHMPMPDSIRILPSYLKRRGYFTGHLRKRHYGPHADRQFDWYDDWETRSPDTFGRFLDEAGDRPFFLWVGFSDPHRPYQEGTLETPHDPADVILPPHLVDAAGTRADRAQYYDEIGRMDGHVGRFLDELEARGLRDNTLVVFLSDNGAPFPREKGTVYDAGIRTPLLFSWPAVIPPGSRYGGLVSVIDLAPTLLDVAGLETPSSMAGRSLRPIFTDPSTPGREYVFAERNWHNCDEHIRAVRTARFKLILNAYTELPLCTPADASNSPSWFDLQKARASGTLTPAQARLFEVPRA…
Thioredoxin reductase (EC 1.8.1.9)	MHDVVIIGAGPVGLACGIEVKRRGLRELVIDKGALVNSLIGYPTQMEFFSTPELLEIGGYPFPTLYYKPTREEALDYYRRVAQAEQLNLRLYERVLRVDGEDGAFVVRTDKGAYPTRKVILATGFFDLPNRMDVPGEDLPKVTHYYKEPYPYAHRKVAVVGAKNSAAKAALECHRHGADVTLVVRGPAVSNSVKYWIKPDLENRIAEGSIRAFFNTTVAAIEPDRLHLHTPDGPVTIANDFVLAMTGYRPDYVFLQTLGIATRDDAARTPVHDEETFETNRAGLYMAGTVCGGLNTSKWFIENGRFHAERIAEHIAAQTPATVDG
transporter, monovalent cation:proton antiporter-2 (CPA2) family	MVEHILIGIVSVLVLSIGSQWLAWRFRIPSILLLLVVGFLAGPVLHLLEPSSLQGDWLFAFVSLAIGLILFEGGLSLRLKDLREVGRAVLHLITIGVLVTWVLVALAAHFVLGFNPSLSILLGALLTVTGPTVITPLLRHVRPSGRVGAVAKWEGITIDPVGAILAVLVLEAIRLIAEGGGGSGDFRSALGHAFEGLLLEVFISVGVSISATFVMVMVLRRRVVPDYLQNSFVLMVLVSTFAIANHLQDEAGLLTATLMGIIMGNQRYVPVRHIIEFKENLSVLLIGSLFILLSARLELSDLRYIDANSFLFLGLLILVVRPAAVLLSSLGTTLTFREQAFLAWLAPRGIVAAAVAALFSFRLEEIFPGQVRGLVPIVFFVIVGTVAVYGLTIAPVARW…
Sodium-dependent phosphate transporter	MFDLDTLAPLPILTGLAGGLALFLFGLDLMSGALKSTAGHRMKRLLARLTTNRFKAAFAGAFVTAVIQSSSVTTVLVVGFVSAGLMTLQQSVGVIMGANVGTTITAQIIAFKVSRYALLLIALGFGLQFLARRDRLRHYGTALLGLGLIFFGMDLMSGATRPLQDYPPFIEAMRRMDHPLLGILASAAFTALVQSSSATTGVIIALALQGFITLEAGIALIFGANIGTCVTALLAAIGKPRAAVQAALVHVLFNVLGVLIWLGFIDQLAWIVRAISPAAEGLTGAARLAAETPRQIANAHTVFNVANLLIFIGFTRPIAWLARRLVPERAAPAGAGVTPRYLDDILLDTPMLALDRVRLELRRLGERAAEMVERSLPVALHGDEDDLQALARLDDEIDA…
Na+/H+ antiporter, putative	MDWIVLLPPIVAIVLALWTRQVYLSLFVGLWLGTTILVGGHPVRGLVELGDQLVAVFADAGNTRVVFFCVLVGGLIALVQASGGVSGFVAWAQRRGWGTDRRGAELLSWCVGMAIFVESSITSLAVGAVSRPFYDRLRLPREKLAYYCDATSAPVCVMLPLNGWGAYILGLLAAQGITTGAVGLLAESLLFNFFALFAIVFSLVLALTGWGFGPMRRAERRAAERGEVIRPGSSPLISAEVADLPPVETSPRQARDFIVPILVMVLMIFVGLWVTGDGNLMQGSGSTSVLWAVGAAIGVAMGMYALPRRGRPPILSLAASTDLVLKGCSALLPVTVLIVFAFALGQVSRALEMGPYLVGLIGENTPAWWLPALVFLIGCFVSFTLGSSWTAFAILMPIA…
Choline-sulfatase (EC 3.1.6.6)	MPRLATLFGALTLLITTASAQPRNVVFILSDDHRYDFMGFHPNAPDFLQTPAMDRMAREGVHLANAFVTTALCSPSRASILTGQYAHRHGVVDNSSPIPEGTRFFPQDLQRHGIQTAFFGKWHMGHEDDHPQQGFDRWVSFRGQGTYYDPVLNIDGERSQHQGYTTDLLTDYALDWMREGRDPERPFFLILSHKAVHAEFEPAERHAGFYEDIDIPYPASMAYTESNYRGKPHWVRAQRDSWHGVDYMYHGQFDFDTFYRRYAETLLALDESIGRVLDELTASGLAEETLVIYMGDNGFLLGEHGLIDKRNAYEESMRVPMLAWAPGFLDAGTTVDGLVRNIDIAPTVLDLMGVSSAIDMDGQSFLPLLQGGAGPADDREFLYEYYWEHAFPHTPTTFA…
Inner membrane protein YrbG, predicted calcium/sodium:proton antiporter	MLLPTLFLLGGFALLYVGAEALVRGGAALALRLGLSPLVVGLTVVAFGTSSPELVVSLKAALDGTSGLALGNVVGSNVANIALILGTSALIRPVAIQSQLIRLDVPIVIGSSLLLVGLLADGVLGRGEGALLTAGIVAYVGFSIRQARRESPVVQAEFAGEIARPDGSAWRDGAMVVIGLGLLVLGGQVFVSGAVDLARLLGVSDAVIGLTIVAVGTSLPELATSVVAAFRDEGDIAVGNVIGSNIFNVLGIIGPVAVVAPVQAGGVAAVDLWAMVGVAVLLLPLMRTGFRLVRWEGALLLLLYAGFVARLALS
Predicted sodium-dependent galactose transporter	MHFTPLDYVVFTLYGVVIVGLGLWVSREREGHQKDTSDYFLAGKALPWWAIGASLIASNISAEQFIGMSGSGFRLGLAIASYEWMAAVTLLVIAYFFLPIYLEKGIYTMPQFLEQRYDGRVRTLLAVFWLLVYVFVNLTSVLYLGALALEGIMGIPLWTGILGLALFATVYSIYGGLKAVAWTDVVQVLVLVGGGLLTTYVALDAYSDGAGVIAGFGKLIQDAGDRFNMILYPGELLYRDDTGTLQDAYQLLPGLGVLLGGMWVANLFYWGCNQYIIQRALAAKSLKEARRGLAFAGYLKLLLPLIVVVPGIVAYALDAPITRGDEAYPWLLATYVGPGLRGLAFAALAAAIVSSLASMMNSTATIFTMDLYRNRFGQDASEAHLVRVGRLTGLVAIAI…
Trehalose synthase (EC 5.4.99.16)	MSSDFLTDPTWYKDAVIYELHVRSFFDANDDGYGDFEGLRRKLPYLASLGINTLWLLPFLESPLRDDGYDIADYFKILPVHGSLDDFRAFLDEAHAHGMRVITELVLNHTSDQHPWFQEARDPASPRHDWYVWSDTTERYADTRIIFTDTEVSNWTWDRKAQKYYWHRFFSHQPDLNYDNPEVRQAMKEVMFFWLDLGVDGLRLDAVPYLYEREGTNCENLPETIAYIKELRAAIEARYGPGKILLAEANQWPEDTLPYFGDGDGVQMAFNFPIMPRMYMALRRENRRPLVEMLELTRDIPEDAQWAIFLRNHDELTLEMVTDEERDYLYHEYANDPRFRINVGIRRRLAPLLGGERKRIELMTALLLSLKGSPVLYYGDEIAMGDDPFLGDRNGVRTP…
Malto-oligosyltrehalose synthase (EC 5.4.99.15)	MIATYRLQLTPDFGFDAVEALVPYFTRLGVSHLYLSPITEARAGSLHGYDVIDHNAIRADFGGREAFDRLRATAHRAGLQLILDFVPNHAGVGPNNAYWQDVLAYGPHSPYAAFFDIDWNPLKPELQGKILLPFLGRPYGEALDDGEIALAYEDGRFYAAYFENRFALAPATYARILEEALPHFERTDAYFDLNDLHRAYASLAPDEYDKAETLRTRLRALADRLDLAPILAAFSGPALHALLERQFWRLSYWKTAGYEINYRRFFDINELVALRMEDPQVFWESHRLLGELLAQEGVAGVRIDHIDGLFDPHGYLERLRELGADHIWVEKILAHGETLPEAWPVEGTTGYEFLNDVMGVLLWADGLHDLHRSYRRFVPQARSYEREVYRSKMLVMETK…
Malto-oligosyltrehalose trehalohydrolase (EC 3.2.1.141)	MSRSDRFPLGALPTDAGVLFRVWAPRAEHVDVVLTETDAVYPMDAVGRGYFERTVPGIGAGTRYKFRLDGDAVYPDPASRYQPEGVHGPSMVVDPSAYAWQDAGWTGRPLQGLVFYELHVGTFSPEGTFAGVRERLPYLRDLGVTAVELMPVADFPGRWNWGYDHAALYAPSRAYGTPDDLRALVDEAHRLGMAVFLDVIYNHLGPDGAYAAAYGPFFTSKHRTPWGDAINLDDEGSEGVRHFFLDNALHWLREYHVDGFRLDATHALFDDSPTHFLAELSAAVAALDEGPRRWLIAEDHRNLNTLVRPRSEGGYGLDGVWVDDVHHLLRNMTAGDTEGYYADFRDATAAQLAKALNQGWYYDGQRSPTSGRPRGTDATPVRHEQCVVFIQNHDQVGNR…
Na+/H+ antiporter	MFSVSTVALFAGVLLLIGIASSKFSARLGMPVLVLFLGVGMLAGSEGLGGVPFEDYGLASSIGSVALALILFDGGLRTSLDSLRAAWRPALVLSTVGVLLTAGLTGLAVAWILNVPLLHGLLLGGIVGSTDAAAVFSILRTSGLRMPERLTATLEVESGSNDPMAILLTVGLIGLLTGTVDSAGALAVLFILQFGVGTLVGLGAGRAASWAIDRINLDHPGLYPILALAFGLLAFGLASVLEGSGFLAVYLAGIVLGNRLVVFRRGIFLFHDAAAWLGQIVLFVMLGLLSFPSRLVAVAGEGLLVALVLTFVARPLAVVASVFPFRFRPKEIVFLSWVGLKGAVPITLATFPLIAGVEGGDLLFNVVFFVVLVSALTQGWSLPAVARRLGLGQPAGSTP…
Glucose-methanol-choline (GMC) oxidoreductase:NAD binding site	MTRSVHLAQQAEEYDAIVVGSGMSGGVAAKELTERGYRTLVLERGRPLQHGAYPMEWKAPWELPNRNLVSPEVAEEHYVQNRNYLLRQETLPYLMNDREVPYIEDKPFTWMRANVVGGRSLLWGRQCYRWSEMDFEANARDGFGVDWPIRYADIAPWYDHVEPYVGISGEALGLQQLPDSRFLPPMAMNAVEQRVREGIQRAFSDRVMTIGRVANLSQGINGRSHCQYRNQCWRGCSYRAYFSSTGVTLPMAEATGNLTLRPNSIVHSVIYDEARGRATGVRVIDAETKQMEEYYGKVVFLCASALGTTQILLNSTSNRFPNGLGNDSGVLGHYLMDHHFRVGASGEMPGFEDRYYYGRRPNGIYIPRFRNLPWDRRTRHADFVRGYGYQGSAFRPGWA…
Thioredoxin reductase (EC 1.8.1.9)	MPQDLLHDGHPDHSAFDGVDFSDAEHPAVVIIGTGPAGWTAALYTARANLKPVVFQGPEPGGQLMTTTDVENYPGFPEGILGPELMEKFQAQATRFGADVRYGTVTHVDFSQRPFRLLVDETTPVLADAVIVSTGASAKYLGLENERRLLGRGVSACATCDGAFFRDQDVAIVGGGDTAMEEALFLTRFARKVYVIHRRDELRASKIMQQRAFKNEKIEFIWNTVVTDVLGENEVEGLMLRNVQTGATTTLAVQGFFVAIGHKPNTDVFRGWLDLDDAGYIRTRPDSTYTNIAGVFACGDAQDHVYRQAVTAAGTGCMAAIDAERWLAEQGDLDEPRTETEYHAAPAVDSAHGHVVRDTTA
Thioredoxin	MAKQFTDATFQEDVLNADKPVLVDFWATWCAPCRMIAPIIEELAEEFEGRAVIGKLDVDHNPQTAMQFGVRSIPTLLFFKNGQVVDQLVGAVPKRVLVNKLEELAGQPA
sodium-solute symporter, putative	MQLVAIDWAIMAAFFALSLGIGLAVSRRAGQDFNAYFLGGRAMPWWLLGISMVATTFSTDTPNLVADIVRSNGTFGNWTWWAFLLTGMLTVFLYARLWRRSEVLTDVEFYEIRYSGRLAAFLRGFRAVYLGILFNIIIMASVTLAAIKIGGVMMNLTPMETVVLAATVTMVYSALGGLTGVLLTDLVQFAIAMLGSIWAAVYILDLPQIGGLEALLAHENVAGALAFWPSFEALTWQEMMPVFFIPLAVQWWAAYYPGAEPGGGGYLVQRMLSAKDEKHAVGATLLFNGLHYALRPWPWILVALASLVVFPDLAALAARFPHIPGQVVRHDLAYPAMLTFLPPGLLGLVITSLAAAYMSTMSTQVNWGSSIIVNDVYRRFVNPGASQKQLVWVGRLCTV…
Thioredoxin	MHTFFAERRPHNGWTPAAYQAQWEEKLARPLRGLDRVARRYALYSRYNHERAAHVRAHYRMSEALREALHGIVAPQLWMVLTEDWCGDSAYSLPIIEQAAALSERVDLRILPRDENLDIMDHYLTNGARSIPRLVAFDASGRELFTWGPRPAPLQALRDRLKAEGADGQTLSNAVIDWYDAGGWVEVDRELAALVQRTVPALEEDRISVGKAS
sodium-solute symporter, putative	MQVLDWVIVGLYILATLGLGVYLSQRASRSLEDFFVSGRSLPWWLAGTSMAATTFSIDTPLYIAGVVGNRGIAGNWEWWAFGVGHVALIYLFARLWRRSEVVTDAELIERRYGGRPAAVLRATKAFLFAVPINCIGIGYIMLAAVKVVGALGVWEALGFGEGTVAGFDPKLLSVIGLSLLVLAYAGFSGLWGVVATDFFQFFLALFGAILVAVYALASPEVGGLGGLVRRVQAETAFDVLAFIPLTWDPEAWFGIGWSAFAGISATTFFAYVFVQWWTFRRSDGGGEFIQRLVAARDEHEAEKAAWFFNLMHYVVRTWPWVLVGLAALVLYPDLEDRELGYPMLMLDFLPVGMLGLVVASLVAAFMSTISTQINWGASYLTNDLYRRFLHPAASQAELV…
Sodium/glutamate symport protein	MPWYKKLHWQIIIGLVLGLLFGIVAAVNGWSGFTSDWIAPWGTIFINLLKLIAVPLILASLITGVTSLSDLSKLSRIGGKTIAIYLGTTLIALTIGLTVVNVMQPGKTVPPDMRDRLQQAYEGDVAARTQAAQAARERGPLQPIVDMVPDNFFSAAADNGNMLQVVFVAILFGIGLLMIPPEKARPVQAFFDGFNVLIIRVVELIMLIAPVGVFALMADTITSIARGGLGEILELLAALGYYCIAVLLGLFIHMLVVYPSLLKLFVRMPLRTFFTGIAPAQLVAFSTSSSGATLPVTMECAEKNLGVSEEVSSFVLPLGATINMDGTALYQAVAAVFIAQALGLGLDLAAQLTIVFTALLASIGTAGVPGAGIVMLVIILESVGVPSAGIALILGVDRI…
Glucose-methanol-choline (GMC) oxidoreductase:NAD binding site	MKNVNIARQDVYDAIVVGSGITGGWAAKELTEKGLRTLLLERGPYVEHGTDYVGEHKAPWELPFNGRGDRRLYEEEYPVQSTCYAFGPASQQFFVNDRKYPYTHDPDKPFLWIRGYHLGGRSLTWGRQSYRWSDLDFEANARDGFGVDWPIRYRDLAPWYDYVEDFAGISGQAEGLAQLPDGVFLPPMEMNAGEKVVKQGIEATFPDRRLTIGRVAVLTRNHRGRAACHYCGPCHRGCSAGAYFSSLSATLPAAQATGNLTIRCDSIVHSVIYDESRGMATGVRVIDRNTKETQEFHGRLVFLCASTLGTTQIMLNSTSRRFPEGIANDSGVLGRYLMDHPYLAGATGEIPDLEDRYYFGHRPNGIYIPRFRNLGDRRSAHSDFLRGYGYQGQASRSGW…
Universal stress protein family	MLHIDRILVPTDYSVCADLALAHAMELAHRYEVSVDVVNVAVTAGEPPLSDAVRYWLAADPDRVSHRRVPGVGVVAALLKLVAREAYDLIVIGMHGHSGVRRFVVGSVTDELVREAPCPVLAVREKAGADAAPSIGAILVPTDFSEHAREALHVAVDLARRYEARLDVLHVVPAQALPPAYSIEPVPAAVGEAERRAEEALRRQVEGERPEVPVATHTRKGVPGRVIVETAEALGSDLIVMATHGRSGLRRLLLGSVTERVLHRVPCPLLVVKSFGHSLRAQPATARARETTAG
transporter, solute:sodium symporter (SSS) family protein	MLTALDYAVIAIYVIAITAFGIRAGGRQRSTADYFLGSRDLPWWAVCFSVVATETSTLTVIGVPAVAFGGTLTFLQITFGYLLGRIIVSLVFLPKYFHGKMSTAYAFLGERFGDGLRATASVTFLVTRLLADGVRLFATAIPLKVIANSAGLDAGYVEIIAFIGVVTILYTLIGGIKAVVWMDVVQMLVYVGGAVLALVVLLVEVPDGWWATAEAAGKTMLFDLGQGESLSEWFTEPYVLFTAVVGGAIFSMASHGTDQLIVQRLLTCRTLRDSQKALITSGVLVMAQFALFLLVGLLLWSYYQGASLEALGLTRGDEIFPKFIIEGLPAGISGLILAGIIAAAMSTLSSSLNSLASSTMMDLYERFSGRSMPQDRALRTARLLTFFWGIVFIGFATLF…
Universal stress protein family	MLHLNHILVAYDYSAFANKALARALRLARVFEAELHVLYADVLFTTPHDETLPTHRGMPLEAVRAHLQETVERIAGKLDIPLADLAVTYAVDRDVAAAPAILTYAEDHPIDLIVIGTHGRRGVPRLLLGSVAEEVVRAALCPVLTVHGNEPDDARPIRRILVPIDFSRHARQALAHAKEMAHLLEAQLILQHVIQEQLHPAFYNTGIFSIYDVEPDIEERARAELQRFYDETDGPAAPPERAPRFVVGPGHPAHEIITLAEEEQVDLIVMATHGRSGLERFLMGSVAERVVRRAPCSVFTVKSFGRSLLSRPDQAAAEASS
Universal stress protein family	MLQIKKILFPTDLSECAEDAFSQAAFLADRFEAELHVLHVVVPHASPLHRLVEDDAPDEAQADAQFEWAVELDAERQQPERVPLIHRQVEHGSASAAIMAYAEDEDIDLIVMGTHGRSGVRRLVLGSVAEAVVREAPCPVLTVHPGDRQGGAATVRRILVPVDFSENATQAIRYARELARLYDARLDLLHAYEEIAIPDVYGVGPVMLPAQTISERVAEALEKLRRETIGSDVPTETHVLIGHPALTILDFAERHGVDLIVIATHGWSGLKRLLLGSITEKVIRMAPCPVFTVRSFGKDLIVEEPAANASSPS
sodium-dependent transporter, putative	MAQHADQRFSSRLGLILSVLGIAVGTGNIWRFPRIAAQNGGDEGAGAFLIAWVLFLFLWSIPLIIAEYALGRKGRMGVVGTFARVAGPRYAWMGGFVGFVSTAIMFYYSVVAGWCVFYFVEMLVNPLPLTTEAATGVWDGFQAGGLPVLFHGLAMGLGALAVWKGVASIERVNKVLIPALLLIVLLCVLRAVTLDGAAAGLAFLFTPQWDLLTRPGLWLEALTQNAWDTGAGWGLILTYGAYMQRRHGVVKNAFLTGLGNNTVSLLAAVMIFGTVFAVLGQQMPKAEVLAVMQNSGPASTGLTFIWMPQLFAKMPAGEMLAVLFFLGLSFAAFSSLISMIELATRVFVDMGLPRRRAVAAVCTVGFLLGVPSAVNLDVFGNQDFVWGVALMISGALVAF…
Choline monooxygenase-like protein with aromatic-ring-hydroxylating dioxygenase domain	MDALPDLTDEVLRIAPLARAETIPSSWYTHPAYHEADRRVLFERCWQYVGHRSRLDGPGAYLRAEVAGHPVVVVRDADDRLRAFYNVCRHRGGPLVTQDCGHARVLQCQYHGWTYRLDGALRGVPRFDRTELFDRKDHGLVSIPLATWQGLVFVNLDEAAAERTPLDTVLDGIAERIAPLRLDDLHFHRRVVYDVACNWKVYVDNYLEGYHLPLVHPELCTVLDVRAYVTETFPFYSLQHSPLREDDTRYNTGDGQAFYYFVFPNIMLNILPGRLQMNAVVPLAPDRTRVIFDYYYDDVATPEARHRIEADQAFSDRVQQEDIAICEHVQRGLASRAYDQGRFSVECEEGVYHFQCLLKAHYRSWRAERTVAEPPAPFQPPSSHA
